# Supplementary material
Source: PubMed Central journal article supplement (PMC2910804)
Supplement: NIHMS217925-supplement-01.pdf [file NIHMS217925-supplement-01.pdf]

**A**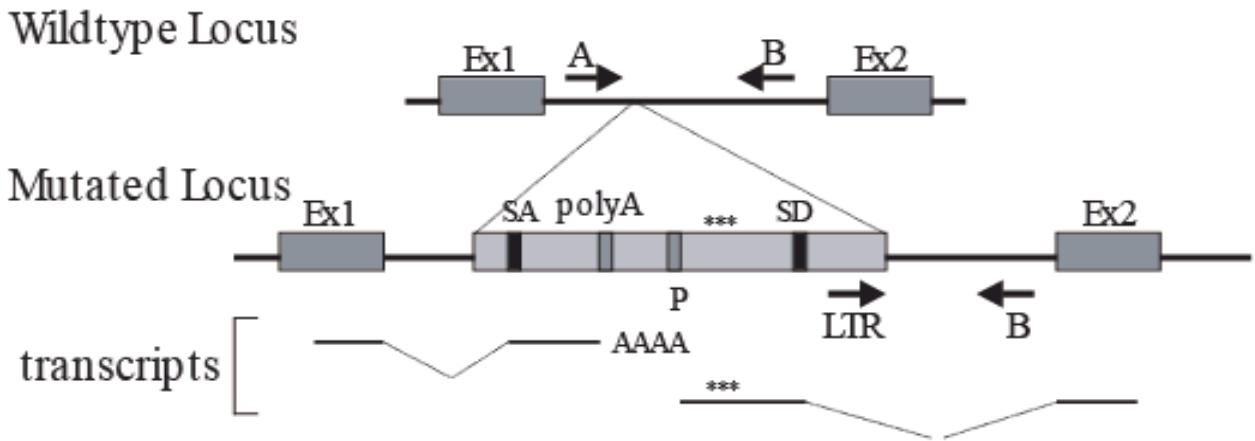**B**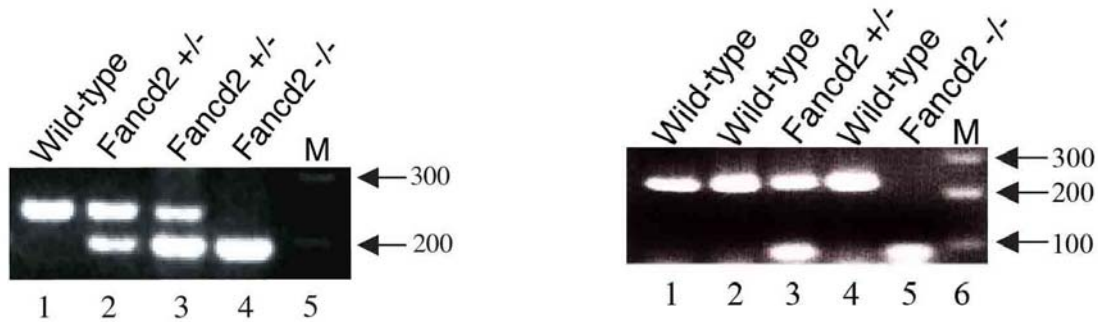

**Figure S1. Generation of *Fancd2*-deficient mice using gene trap insertional mutagenesis of the murine *Fancd2* gene.** (A) Schematic representation of the murine *Fancd2* gene carrying a VICTR insertion within intron 1. Two independently derived ES cell lines (OST2 and OST5), both carrying retroviral insertions at different sites within intron 1, were used to generate *Fancd2*<sup>-/-</sup> mice. Ex: exon, SA: splice acceptor, SD: splice donor. Asterisks depict the stop codons in the reading frames. Arrows illustrate the positions of the PCR primers used to genotype the mice. (B) PCR genotyping of wild type, *Fancd2*<sup>+/-</sup> and *Fancd2*<sup>-/-</sup> mice, left panel for OST2 and right panel for OST5 mouse lines.

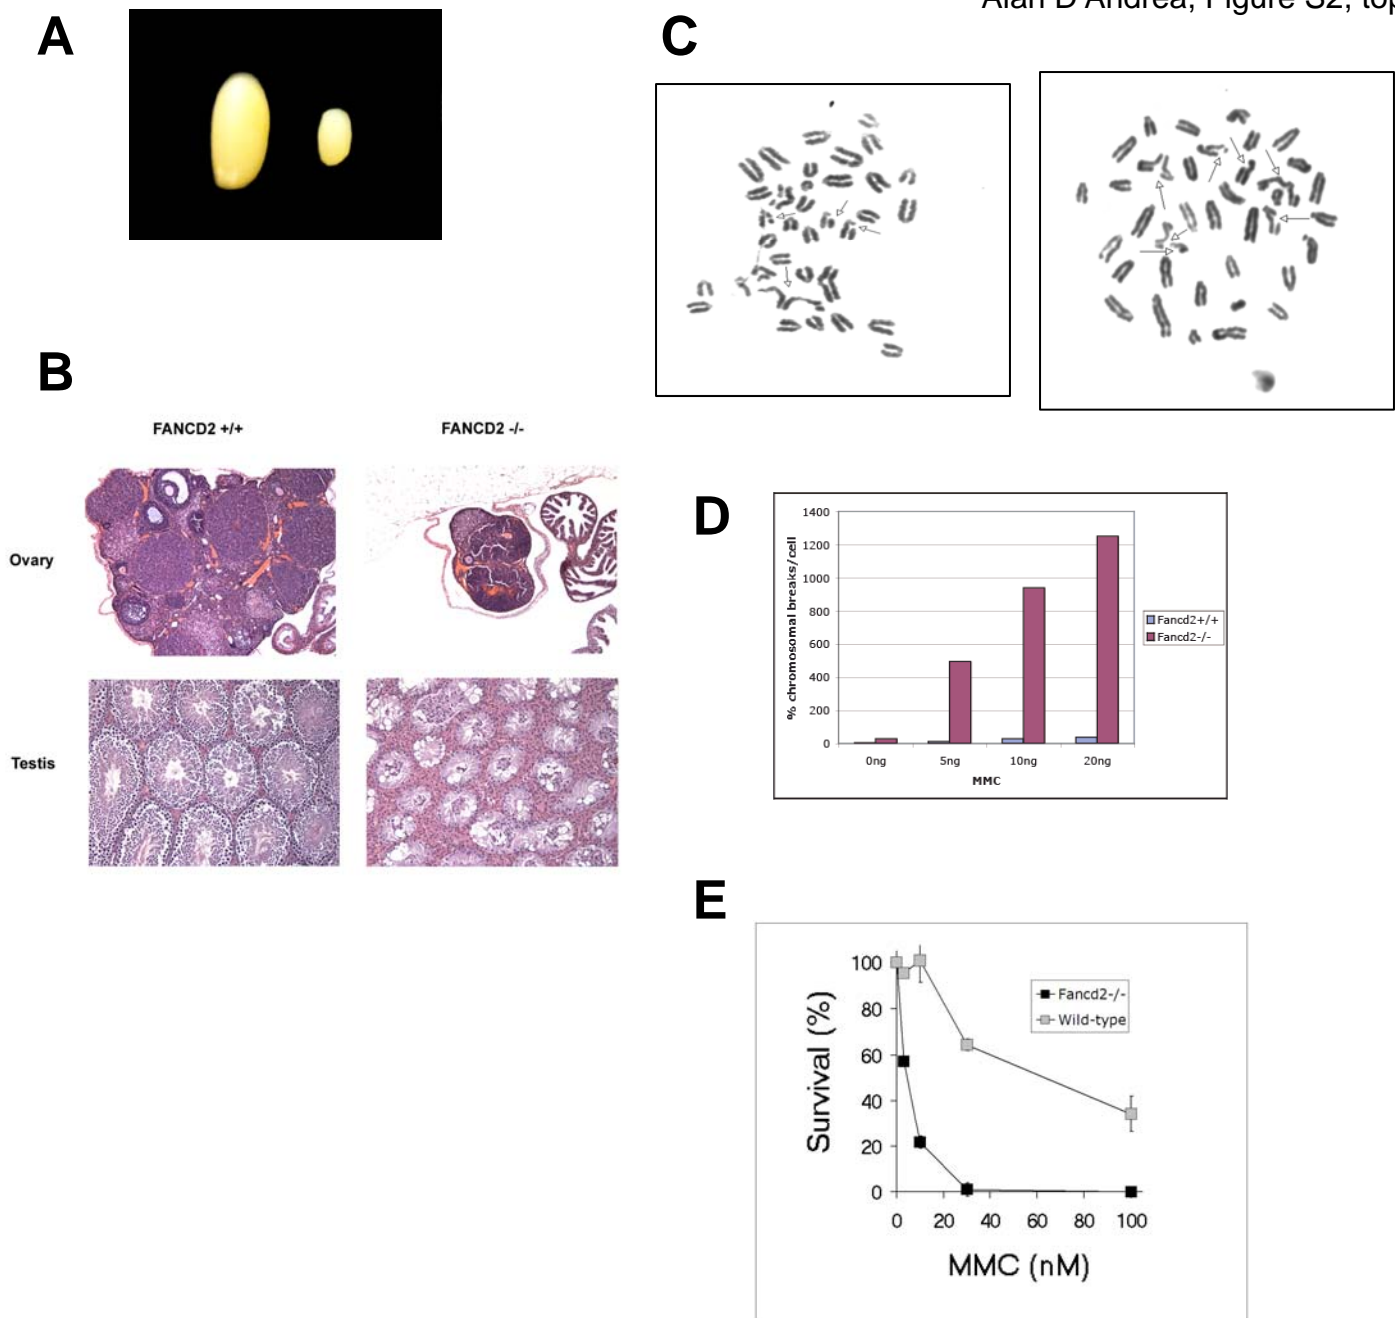

**Figure S2. Fancd2-deficient mice exhibit hallmark features of Fanconi anemia.**

(A) Reduced testes size in *Fancd2*<sup>-/-</sup> mice (right) (B) Histology of ovaries and testes from wild-type (*Fancd2*<sup>+/+</sup>) and *Fancd2*<sup>-/-</sup> mice. H & E staining of the tissues is shown, Magnification 200X (C) Metaphase spreads of splenocytes from *Fancd2*<sup>-/-</sup> mice after 72 hours of in vitro culturing with 5ng/ml MMC (left panel) or 10 ng/ml MMC (right panel). Arrows indicate radial forms or breaks (D) Chromosomal aberrations per cell were compared between wild-type (*Fancd2*<sup>+/+</sup>) and *Fancd2*<sup>-/-</sup> mouse splenocytes treated with the indicated concentrations of MMC for 48 hours. The values in the y-axis of the plot denote the number of aberrations per 100 cells. (E) Clonogenic survival assay of bone marrow cells from wild-type (gray squares) and *Fancd2*<sup>-/-</sup> (filled squares) mice. Bone marrow cells were plated in methylcellulose in the presence of the indicated concentration of MMC. After 7-10 days in culture, hematopoietic colonies were enumerated.

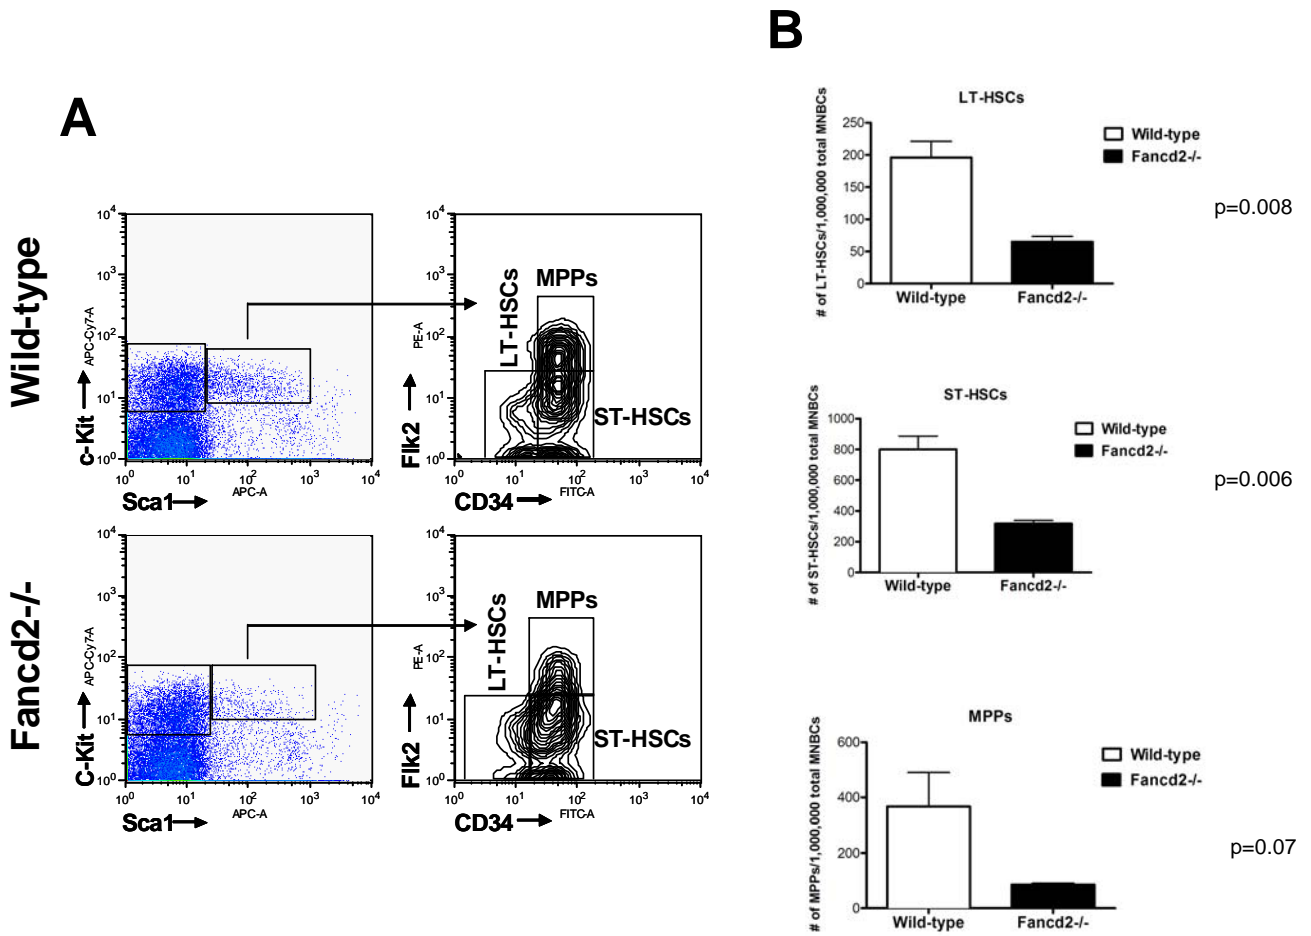

**Figure S3. *Fancd2*<sup>-/-</sup> bone marrow contains low numbers of MPPs, ST-HSCs and LT-HSCs.** Bone marrow cells were harvested from wild-type and *Fancd2*<sup>-/-</sup> mice and stained for multipotent progenitors (MPPs), short-term HSCs (ST-HSCs) and long-term HSCs (LT-HSCs). (A) Representative flow cytometric plots (upper plots from wild-type mouse and lower plots from *Fancd2*<sup>-/-</sup> mouse) pregated on Lineage negative cells are shown. MPPs were gated as Lin-Sca<sup>+</sup>c-Kit<sup>+</sup>Flk2<sup>+</sup>CD34<sup>+</sup>, ST-HSCs were gated as Lin-Sca<sup>+</sup>c-Kit<sup>+</sup>Flk2<sup>-</sup>CD34<sup>+</sup>, and LT-HSCs were gated as Lin-Sca<sup>+</sup>c-Kit<sup>+</sup>Flk2<sup>-</sup>CD34<sup>-</sup> cells. (B) The numbers of LT-HSCs, ST-HSCs and MPPs in wild-type and *Fancd2*<sup>-/-</sup> mice are shown. Data are average from 3 mice per group. Error bars indicate SEM.

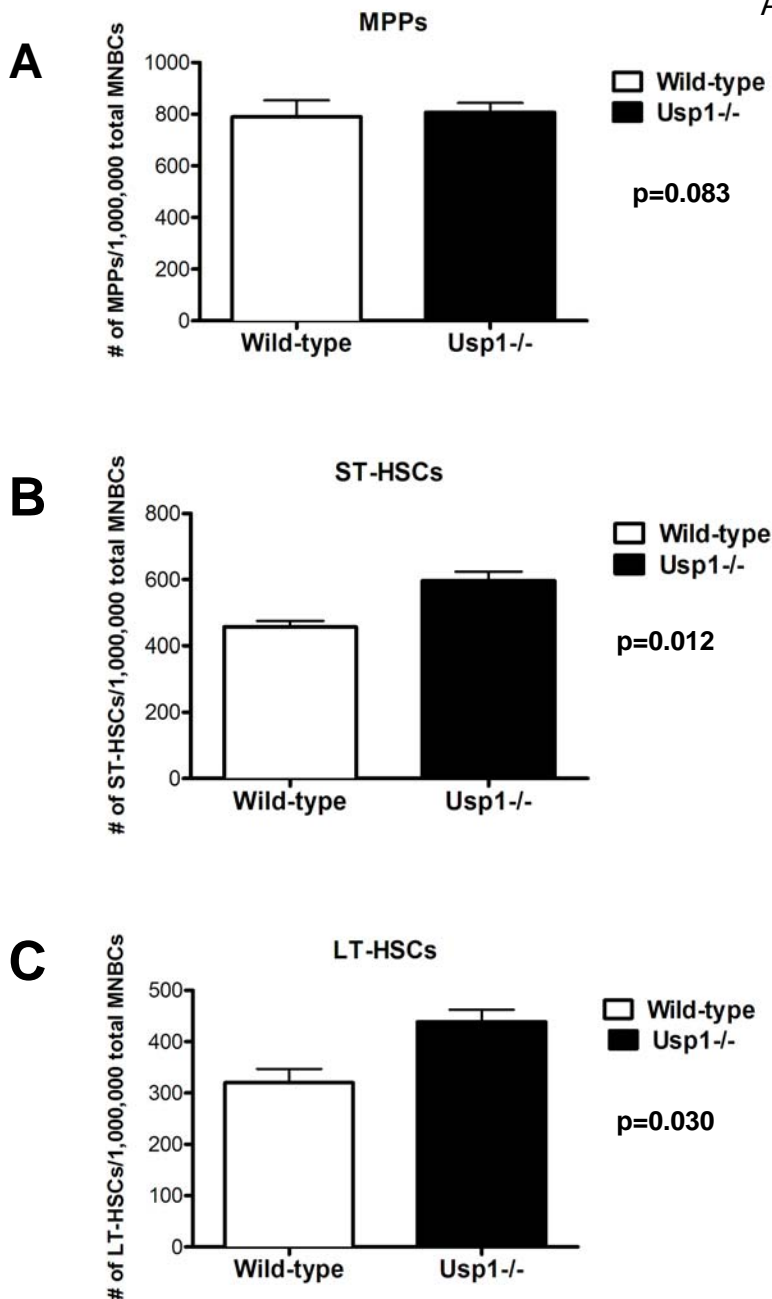

**Figure S4. Increased numbers of ST-HSCs and LT-HSCs in *Usp1*<sup>-/-</sup> mice.** Bone marrow cells were harvested from wild-type and *Usp1*<sup>-/-</sup> mice and stained for multipotent progenitors (MPPs), short-term HSCs (ST-HSCs) and long-term HSCs (LT-HSCs). The numbers of (A) MPPs (Lin-Sca+c-Kit+Flk2+CD34+ cells), (B) ST-HSCs (Lin-Sca+c-Kit+Flk2-CD34+ cells), and (C) LT-HSCs (Lin-Sca+c-Kit+Flk2-CD34- cells) in wild-type and *Usp1*<sup>-/-</sup> mice are shown. Data are average from 3 mice per group in panels A-C. Error bars indicate SEM..

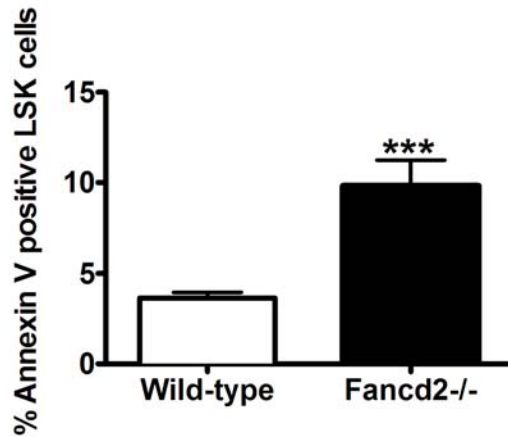

**Figure S5. Loss of Fancd2 leads to increased apoptosis in bone marrow HSCs.** Bone marrow cells were harvested from wild-type or *Fancd2*<sup>-/-</sup> mice and stained with antibodies against lineage markers (lin), Sca-1, and c-Kit. The cells were further stained with Annexin-V. Cells were then analyzed by flow cytometry to detect Lin-Sca-1+c-Kit<sup>+</sup> (LSK) fractions. Frequency of apoptotic cells in HSC fraction was determined by analyzing Annexin-V staining on LSK cells. Data are from n=9 wild-type or *Fancd2*<sup>-/-</sup> mice and mean values  $\pm$  SEM are shown. Asterisks represent statistically significant difference in the *Fancd2*<sup>-/-</sup> mice compared to the wild-type mice with p values =0.0007.

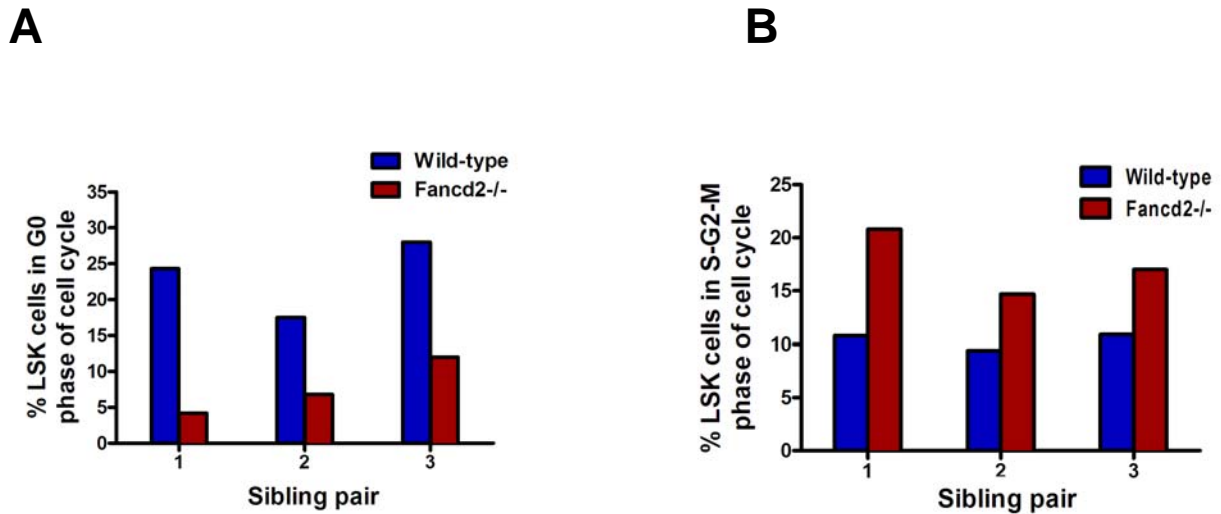

**Figure S6. Loss of Fancd2 leads to decreased quiescence and increased cycling of bone marrow HSCs.** Bone marrow cells were harvested from wild-type or *Fancd2*<sup>-/-</sup> mice, lineage depleted, and stained with anti-Sca-1 and anti-c-Kit antibodies. Following fixation and permeabilization, cells were stained with anti-Ki67 and 7-AAD and analyzed by flow cytometry to separate cells in different phases of the cell cycle, based on DNA content (7-AAD) and expression of Ki67. The frequencies of Lin-Sca-1<sup>+</sup>c-Kit<sup>+</sup> (LSK) cells in G0 phase of cell cycle (A) and S/G2/M phase of cell cycle (B) are shown. Data are from three individual wild-type or *Fancd2*<sup>-/-</sup> mouse sibling pairs.
